# Supplementary material
Source: MDPI journal article supplement (https://www.mdpi.com/2218-2004/11/3/56)
Supplement: s1 [file s1]

# Supplementary material

## Searching for systems with planar hexacoordinate carbons

**Diego Inostroza<sup>1,2</sup>, Luis Leyva-Parra<sup>1,2</sup>, Osvaldo Yañez<sup>3,\*</sup>, José Solar-Encinas<sup>1,2</sup>, Alejandro Vásquez-Espinal<sup>4</sup>, Maria Luisa Valenzuela<sup>5</sup> and William Tiznado<sup>1,\*</sup>**

<sup>1</sup> Computational and Theoretical Chemistry Group, Departamento de Ciencias Química, Facultad de Ciencias Exactas, Universidad Andrés Bello, República 275, Santiago, Chile; [wtiznado@unab.cl](mailto:wtiznado@unab.cl) ; [leyvaluis177@gmail.com](mailto:leyvaluis177@gmail.com) ; [dinostro92@gmail.com](mailto:dinostro92@gmail.com) ; [j.solarencinas@uandresbello.edu](mailto:j.solarencinas@uandresbello.edu)

<sup>2</sup> Programa de Doctorado en Fisicoquímica Molecular, Facultad de Ciencias Exactas, Universidad Andrés Bello, Av. República 275, Santiago 8370146; [l.leyvaparra@uandresbello.edu](mailto:l.leyvaparra@uandresbello.edu) ; [dinostro92@gmail.com](mailto:dinostro92@gmail.com) ; [j.solarencinas@uandresbello.edu](mailto:j.solarencinas@uandresbello.edu)

<sup>3</sup> Núcleo de Investigación en Data Science, Facultad de Ingeniería y Negocios, Universidad de las Américas, Santiago 7500000, Chile; [oyanez@udla.cl](mailto:oyanez@udla.cl)

<sup>4</sup> Química y Farmacia, Facultad de Ciencias de la Salud, Universidad Arturo Prat, Casilla 121, Iquique 1100000, Chile; [alvasquez@unap.cl](mailto:alvasquez@unap.cl)

<sup>5</sup> Grupo de Investigación en Energía y Procesos Sustentables, Instituto de Ciencias Químicas Aplicadas, Facultad de Ingeniería, Universidad Autónoma de Chile, Av. El Llano Subercaseaux 2801, Santiago 8900000, Chile; [maria.valenzuela@uautonoma.cl](mailto:maria.valenzuela@uautonoma.cl)

\* Correspondence: [wtiznado@unab.cl](mailto:wtiznado@unab.cl) ; [oyanez@udla.cl](mailto:oyanez@udla.cl); Tel.: (optional; include country code; if there are multiple corresponding authors, add author initials)

**Figure S1.** Adaptive Natural Density Partitioning bonding pattern of the  $M_2C_5^{2+}$  ( $M = \text{Be}, \text{Ca}, \text{Mg}$ ) at the  $\omega\text{b97XD/Def2-TZVP}$  level.

|                      | E-LPs                                                                             | E-E $\sigma$ -bonds                                                                | E-E $\pi$ -bond                                                                     |
|----------------------|-----------------------------------------------------------------------------------|------------------------------------------------------------------------------------|-------------------------------------------------------------------------------------|
|                      | 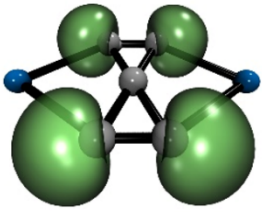 |  |  |
|                      | 4 x 1c-2e                                                                         | 6 x 2c-2e                                                                          | 1 x 5c-2e                                                                           |
| <b>E = C, M = Be</b> | ON = 1.80  e                                                                      | ON = 1.97 – 1.78  e                                                                | ON = 1.99  e                                                                        |
| <b>E = C, M = Mg</b> | ON = 1.85  e                                                                      | ON = 1.97 – 1.78  e                                                                | ON = 1.99  e                                                                        |
| <b>E = C, M = Ca</b> | ON = 1.88  e                                                                      | ON = 1.96 – 1.77  e                                                                | ON = 1.99  e                                                                        |

**Figure S2.** Adaptive Natural Density Partitioning bonding pattern of the  $M_2C_5$  ( $M = \text{Al}, \text{Ga}, \text{In}$ ) at the  $\omega\text{b97XD/Def2-TZVP}$  level.

|                      | M-LPs                                                                               | E-LPs                                                                               | E-E $\sigma$ -bonds                                                                  | E-E $\pi$ -bond                                                                       |
|----------------------|-------------------------------------------------------------------------------------|-------------------------------------------------------------------------------------|--------------------------------------------------------------------------------------|---------------------------------------------------------------------------------------|
|                      | 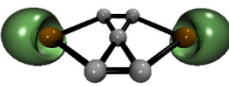 |  |  |  |
|                      | 2 x 1c-2e                                                                           | 4 x 1c-2e                                                                           | 6 x 2c-2e                                                                            | 1 x 5c-2e                                                                             |
| <b>E = C, M = Al</b> | ON = 1.97  e                                                                        | ON = 1.81  e                                                                        | ON = 1.97 – 1.78  e                                                                  | ON = 1.99  e                                                                          |
| <b>E = C, M = Ga</b> | ON = 1.97  e                                                                        | ON = 1.81  e                                                                        | ON = 1.96 – 1.78  e                                                                  | ON = 1.99  e                                                                          |
| <b>E = C, M = In</b> | ON = 1.98  e                                                                        | ON = 1.82  e                                                                        | ON = 1.96 – 1.78  e                                                                  | ON = 1.99  e                                                                          |

**Figure S3.** Adaptive Natural Density Partitioning bonding pattern of the  $\text{Zn}_2\text{C}_5^{2+}$  at the  $\omega\text{b97XD/Def2-TZVP}$  level.

| Zn-LPs                       |                                                                                   |                                                                                   |                                                                                    |                                                                                     |
|------------------------------|-----------------------------------------------------------------------------------|-----------------------------------------------------------------------------------|------------------------------------------------------------------------------------|-------------------------------------------------------------------------------------|
|                              | 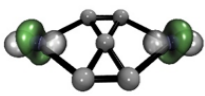 |  |  |  |
|                              | 2 x 1c-2e                                                                         | 2 x 1c-2e                                                                         | 2 x 1c-2e                                                                          | 2 x 1c-2e                                                                           |
| $\text{C}_5\text{Zn}_2^{2+}$ | ON = 1.99  e                                                                      | ON = 1.99  e                                                                      | ON = 1.99  e                                                                       | ON = 1.99  e                                                                        |
|                              |                                                                                   |                                                                                   |                                                                                    |                                                                                     |
|                              | Zn-LPs                                                                            | C-LPs                                                                             | C-C $\sigma$ -bonds                                                                | C-C $\pi$ -bond                                                                     |
|                              |  |  |  |  |
|                              | 2 x 1c-2e                                                                         | 4 x 1c-2e                                                                         | 6 x 2c-2e                                                                          | 1 x 5c-2e                                                                           |
| $\text{C}_5\text{Zn}_2^{2+}$ | ON = 1.99  e                                                                      | ON = 1.74  e                                                                      | ON = 1.97 – 1.77  e                                                                | ON = 1.99  e                                                                        |

**Figure S4.** Putative global minimum and low-lying isomers of complex  $(\text{C}_6\text{H}_6)_2\text{-Li}_2\text{C}_5$ . Relative energies are shown in  $\text{kcal}\cdot\text{mol}^{-1}$  at  $\omega\text{b97XD/def2-TZVP}$  level including zero-point energy (ZPE) corrections and their lowest harmonic vibrational frequency in  $\text{cm}^{-1}$ .

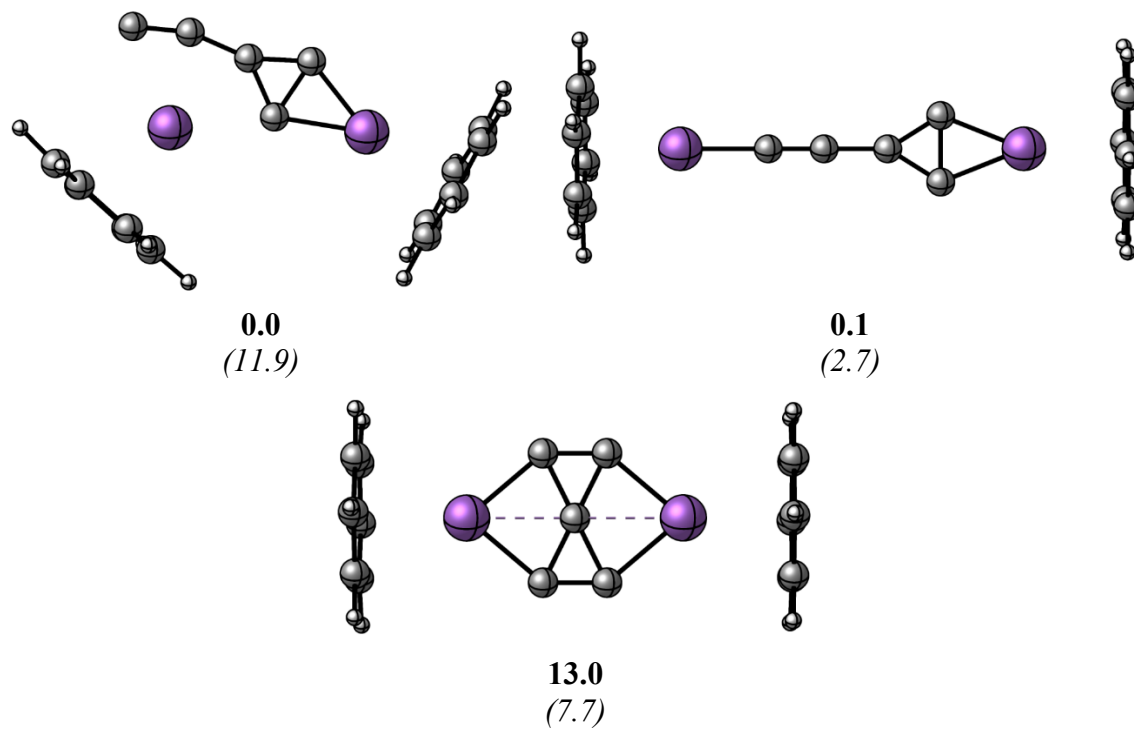

**Figure S5.** Putative global minimum and low-lying isomers of complex  $(\text{C}_6\text{H}_6)_2\text{-Na}_2\text{C}_5$ . Relative energies are shown in  $\text{kcal}\cdot\text{mol}^{-1}$  at  $\omega\text{b97XD/def2-TZVP}$  level including zero-point energy (ZPE) corrections and their lowest harmonic vibrational frequency in  $\text{cm}^{-1}$ .

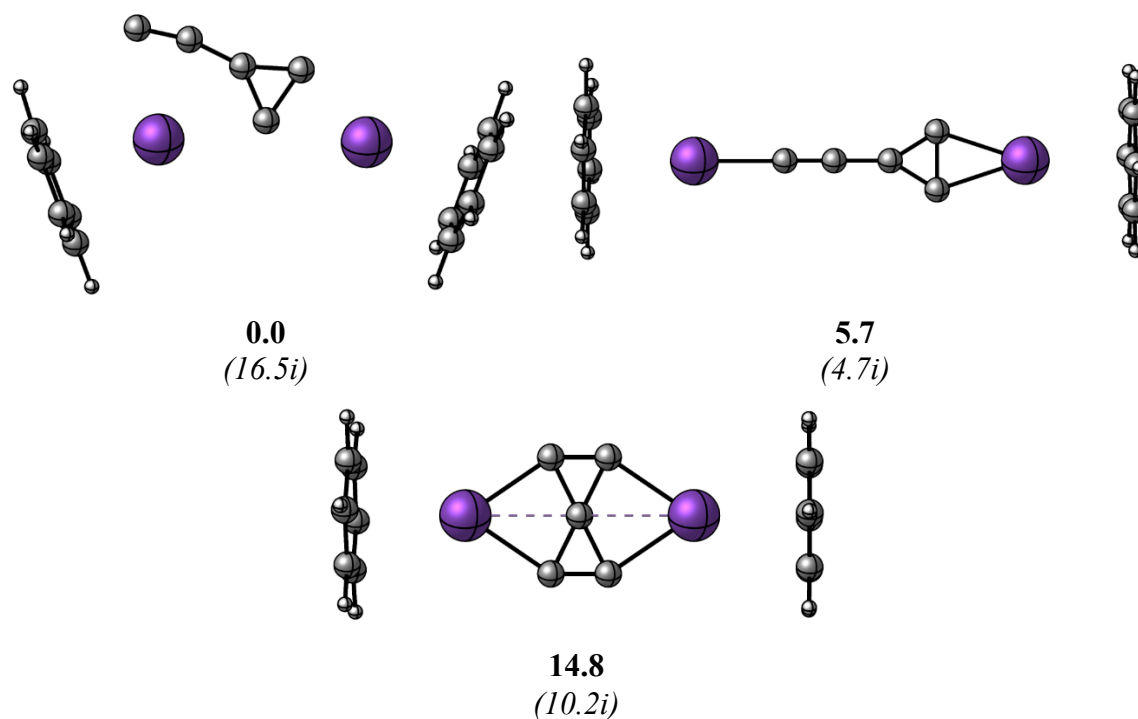

**Figure S6.** Putative global minimum and low-lying isomers of complex  $(\text{C}_6\text{H}_6)_2\text{-K}_2\text{C}_5$ . Relative energies are shown in  $\text{kcal}\cdot\text{mol}^{-1}$  at  $\omega\text{b97XD/def2-TZVP}$  level including zero-point energy (ZPE) corrections and their lowest harmonic vibrational frequency in  $\text{cm}^{-1}$ .

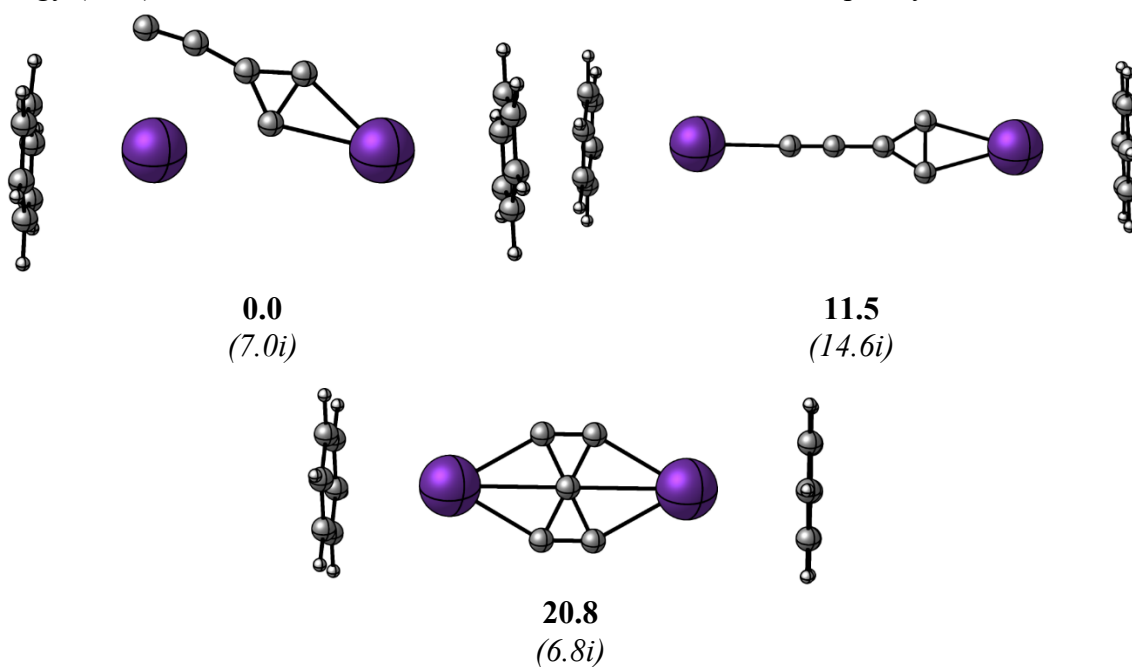

**Figure S7.** Putative global minimum and low-lying isomers of complex  $(\text{C}_6\text{H}_6)_2\text{-Al}_2\text{C}_5$ . Relative energies are shown in  $\text{kcal}\cdot\text{mol}^{-1}$  at  $\omega\text{b97XD/def2-TZVP}$  level including zero-point energy (ZPE) corrections and their lowest harmonic vibrational frequency in  $\text{cm}^{-1}$ .

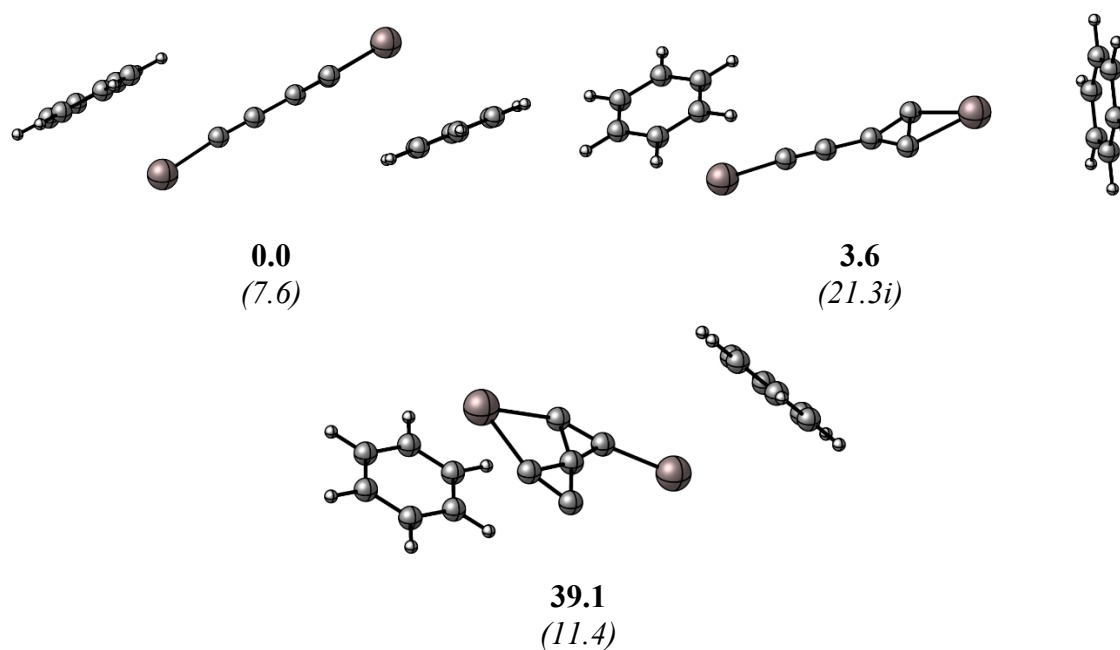

**Figure S8.** Putative global minimum and low-lying isomers of complex  $(\text{C}_6\text{H}_6)_2\text{-Ga}_2\text{C}_5$ . Relative energies are shown in  $\text{kcal}\cdot\text{mol}^{-1}$  at  $\omega\text{b97XD/def2-TZVP}$  level including zero-point energy (ZPE) corrections and their lowest harmonic vibrational frequency in  $\text{cm}^{-1}$ .

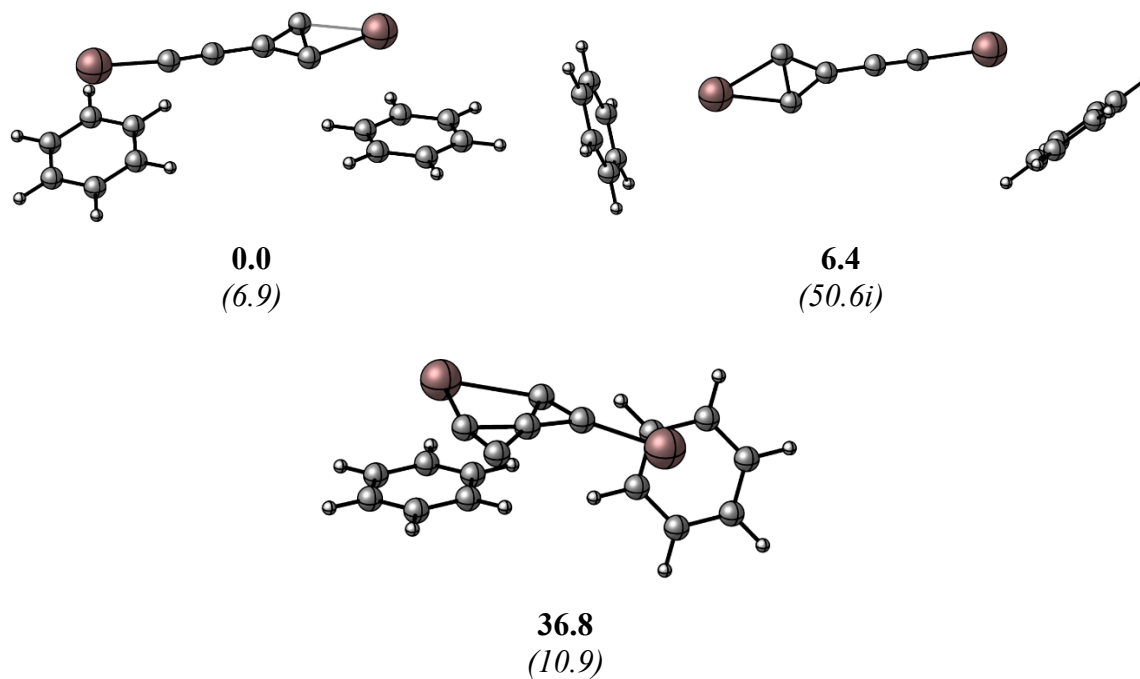

**Figure S9.** Putative global minimum and low-lying isomers of complex  $(\text{C}_6\text{H}_6)_2\text{-In}_2\text{C}_5$ . Relative energies are shown in  $\text{kcal}\cdot\text{mol}^{-1}$  at  $\omega\text{b97XD/def2-TZVP}$  level including zero-point energy (ZPE) corrections and their lowest harmonic vibrational frequency in  $\text{cm}^{-1}$ .

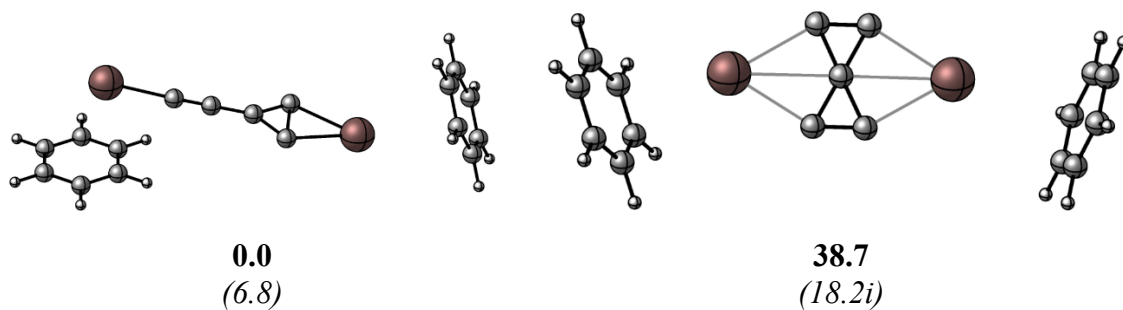

**Figure S10.** Putative global minimum and low-lying isomers of  $(\text{C}_5\text{H}_5^-)_2\text{-Be}_2\text{C}_5^{2+}$ . Relative energies are shown in  $\text{kcal}\cdot\text{mol}^{-1}$  at  $\omega\text{b97XD/def2-TZVP}$  level including zero-point energy (ZPE) corrections and their lowest harmonic vibrational frequency in  $\text{cm}^{-1}$ .

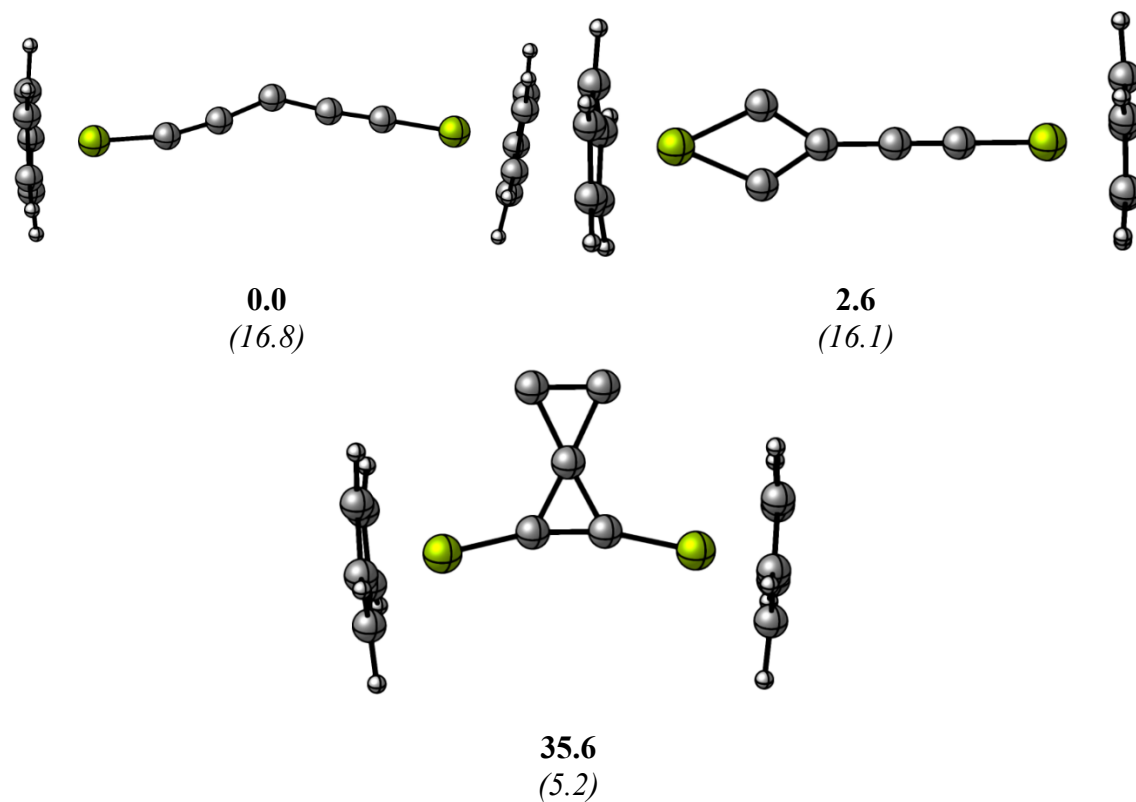

**Figure S11.** Putative global minimum and low-lying isomers of  $(\text{C}_5\text{H}_5^-)_2\text{-Mg}_2\text{C}_5^{2+}$ . Relative energies are shown in  $\text{kcal}\cdot\text{mol}^{-1}$  at  $\omega\text{b97XD/def2-TZVP}$  level including zero-point energy (ZPE) corrections and their lowest harmonic vibrational frequency in  $\text{cm}^{-1}$ .

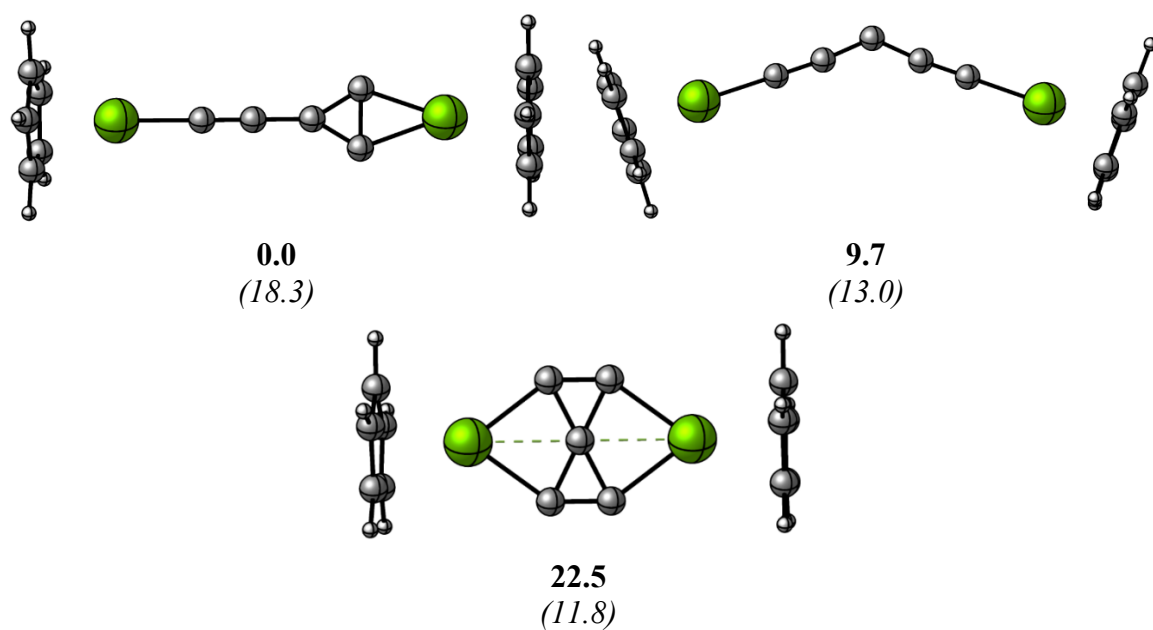



**Figure S12.** Putative global minimum and low-lying isomers of  $(C_5H_5^-)_2-Ca_2C_5^{2+}$ . Relative energies are shown in  $\text{kcal}\cdot\text{mol}^{-1}$  at  $\omega\text{b97XD/def2-TZVP}$  level including zero-point energy (ZPE) corrections and their lowest harmonic vibrational frequency in  $\text{cm}^{-1}$ .

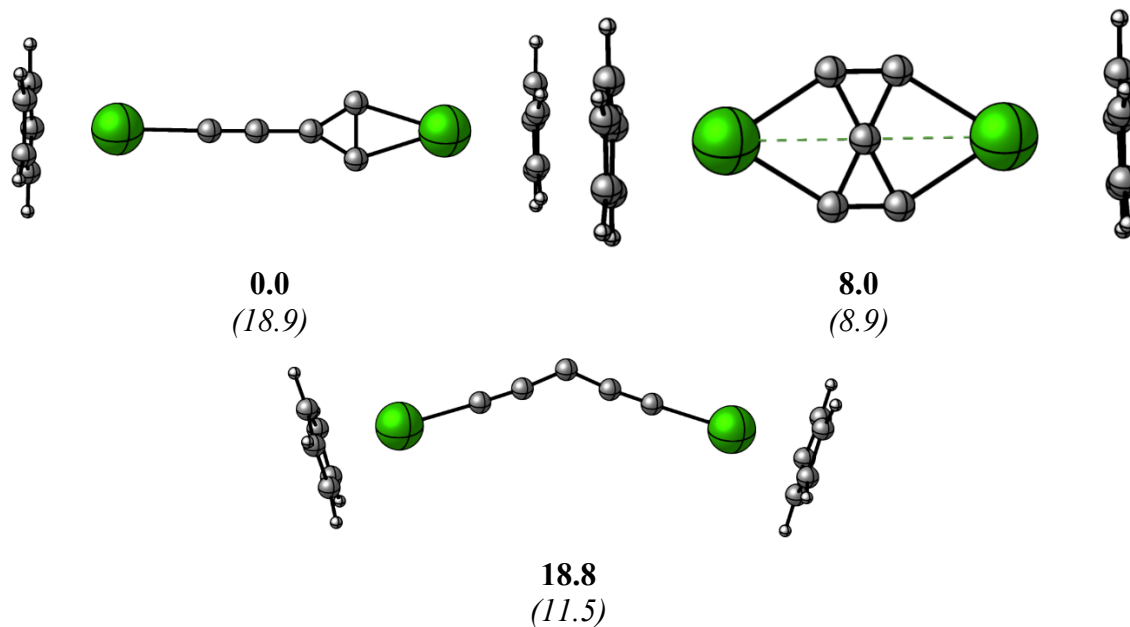

**Figure S13.** Putative global minimum and low-lying isomers of  $(\text{C}_5\text{H}_5^-)_2\text{-Zn}_2\text{C}_5^{2+}$ . Relative energies are shown in  $\text{kcal}\cdot\text{mol}^{-1}$  at  $\omega\text{b97XD/def2-TZVP}$  level including zero-point energy (ZPE) corrections and their lowest harmonic vibrational frequency in  $\text{cm}^{-1}$ .

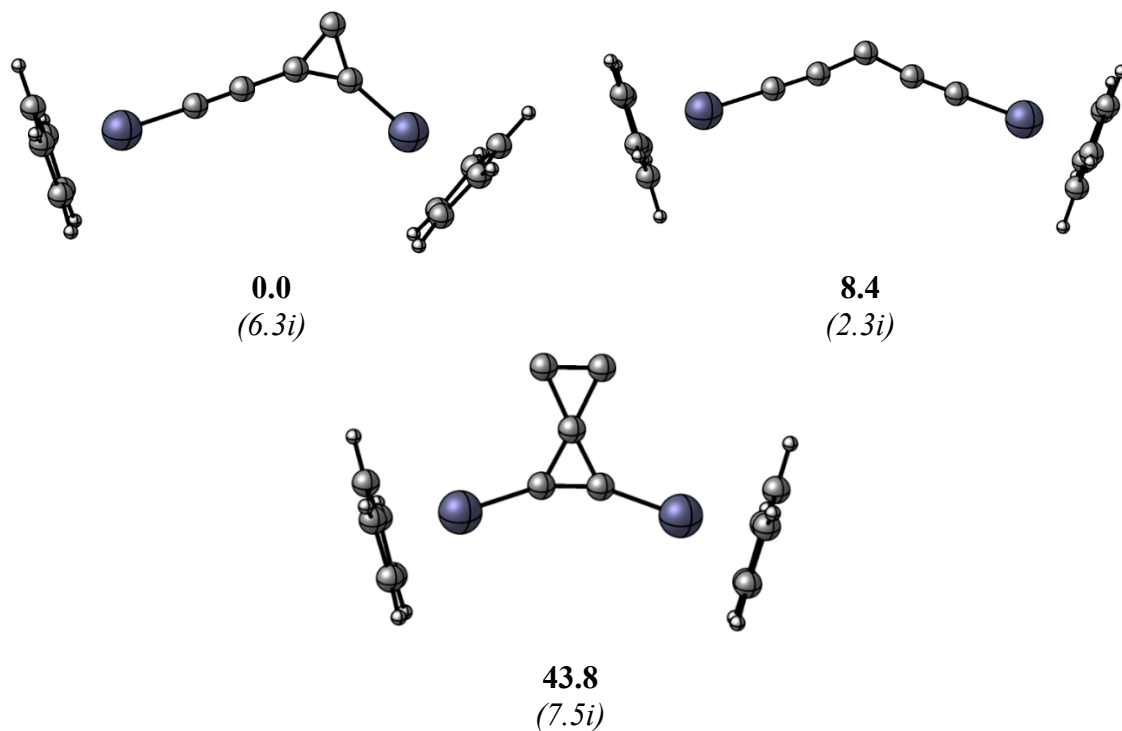

**Figure S14.** Putative global minimum and low-lying isomers of  $[8\text{-CPP}]^{2-}[\text{Ca}_2\text{C}_5]^{2+}$ . Relative energies are shown in  $\text{kcal}\cdot\text{mol}^{-1}$  at  $\omega\text{b97XD/def2-TZVP}$  level including zero-point energy (ZPE) corrections and their lowest harmonic vibrational frequency in  $\text{cm}^{-1}$ . A number-letter label is given to facilitate their connection with their cartesian coordinates in Table S2.

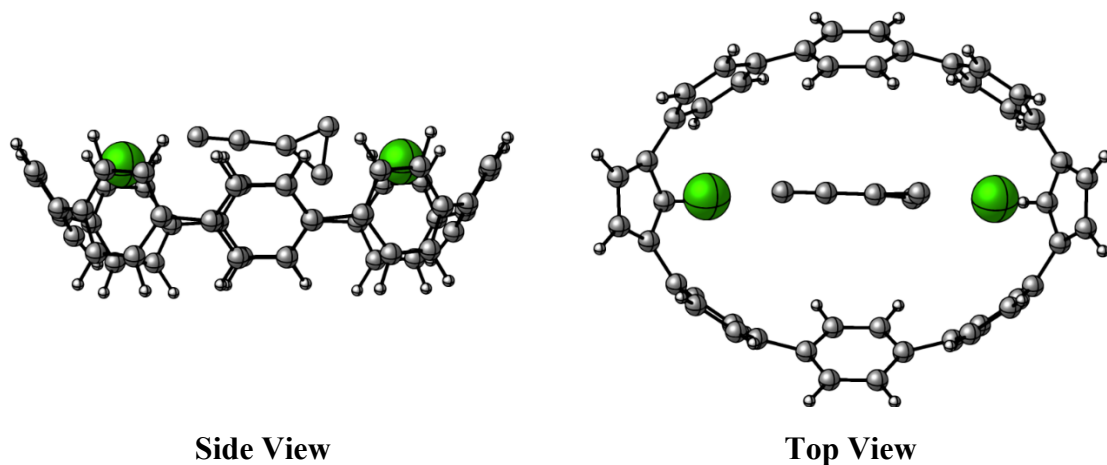

**1A. 0.0**  
(22.3)

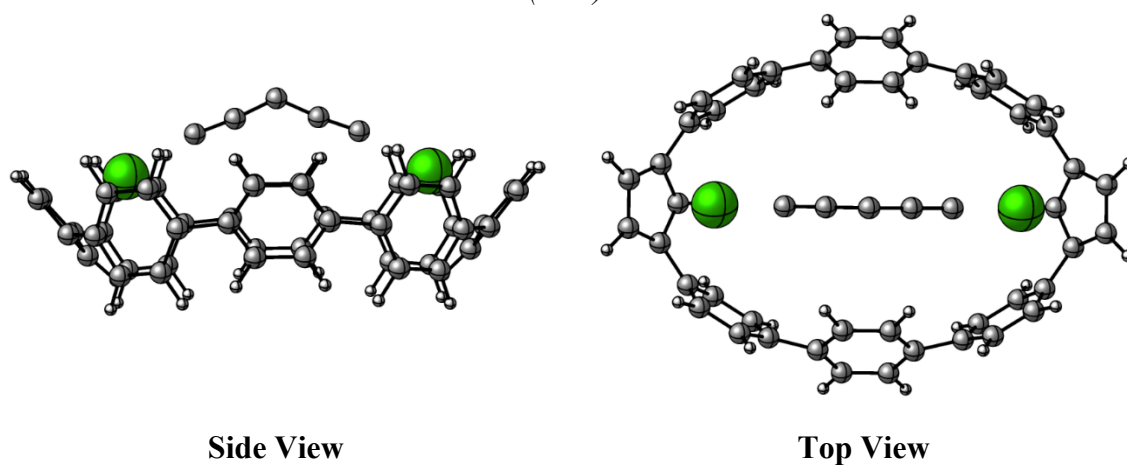

**1B.14.7**  
(19.6)

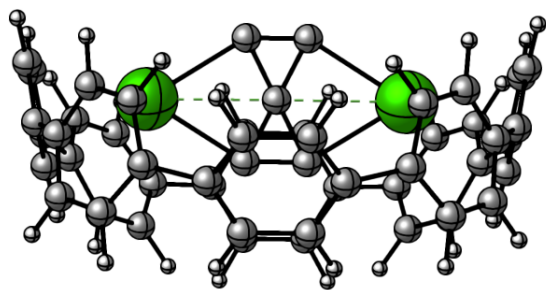

Side View

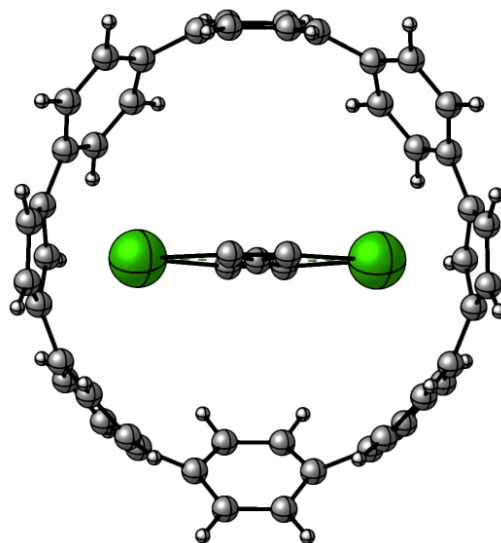

Top View

**1C. 18.5**  
(25.9)

**Table S1.** Cartesian coordinates of the  $M_2C_5^{0/2+}$  ( $M = \text{Li-K, Be-Ca, Al-In, and Zn}$ ) phC minima optimized structures at the  $\omega\text{b97XD/def2-TZVP}$  level.

| $C_5Li_2$      |              |              |              | $C_5Na_2$      |              |              |              |
|----------------|--------------|--------------|--------------|----------------|--------------|--------------|--------------|
| 3              | -0.002663000 | -2.199611000 | 0.021810000  | 11             | -0.003182000 | -2.605458000 | 0.000331000  |
| 6              | -1.341344000 | 0.662519000  | -0.016844000 | 6              | -1.339963000 | 0.665290000  | -0.000280000 |
| 6              | 1.341453000  | -0.662454000 | -0.016991000 | 6              | 1.340114000  | -0.665186000 | -0.000406000 |
| 3              | 0.002669000  | 2.199920000  | 0.021645000  | 11             | 0.003216000  | 2.605742000  | 0.000153000  |
| 6              | 1.342932000  | 0.659031000  | -0.016882000 | 6              | 1.341629000  | 0.661854000  | -0.000149000 |
| 6              | -0.000002000 | -0.000128000 | 0.024595000  | 6              | -0.000033000 | -0.000140000 | 0.000932000  |
| 6              | -1.343027000 | -0.658955000 | -0.017029000 | 6              | -1.341764000 | -0.661778000 | -0.000275000 |
| $C_5K_2$       |              |              |              | $C_5Be_2^{2+}$ |              |              |              |
| 19             | 2.983380000  | 0.000000000  | -0.000280000 | 4              | 0.000000000  | 0.000000000  | 1.984180000  |
| 6              | -0.661900000 | 1.346049000  | 0.000316000  | 6              | 0.000000000  | 1.245480000  | -0.663083000 |
| 6              | 0.661896000  | -1.346036000 | 0.000307000  | 6              | 0.000000000  | -1.245480000 | 0.663083000  |
| 19             | -2.983371000 | -0.000001000 | -0.000096000 | 4              | 0.000000000  | 0.000000000  | -1.984180000 |
| 6              | -0.661895000 | -1.346053000 | 0.000315000  | 6              | 0.000000000  | -1.245480000 | -0.663083000 |
| 6              | -0.000018000 | 0.000000000  | -0.000054000 | 6              | 0.000000000  | 0.000000000  | 0.000000000  |
| 6              | 0.661890000  | 1.346041000  | 0.000307000  | 6              | 0.000000000  | 1.245480000  | 0.663083000  |
| $C_5Mg_2^{2+}$ |              |              |              | $C_5Ca_2^{2+}$ |              |              |              |
| 12             | 0.000000000  | 0.000000000  | 2.370215000  | 20             | 0.000000000  | 0.000000000  | 2.642126000  |
| 6              | 0.000000000  | 1.309623000  | -0.661723000 | 6              | 0.000000000  | 1.338681000  | -0.660199000 |
| 6              | 0.000000000  | -1.309623000 | 0.661723000  | 6              | 0.000000000  | -1.338681000 | 0.660199000  |
| 12             | 0.000000000  | 0.000000000  | -2.370215000 | 20             | 0.000000000  | 0.000000000  | -2.642126000 |
| 6              | 0.000000000  | -1.309623000 | -0.661723000 | 6              | 0.000000000  | -1.338681000 | -0.660199000 |
| 6              | 0.000000000  | 0.000000000  | 0.000000000  | 6              | 0.000000000  | 0.000000000  | 0.000000000  |
| 6              | 0.000000000  | 1.309623000  | 0.661723000  | 6              | 0.000000000  | 1.338681000  | 0.660199000  |
| $C_5Al_2$      |              |              |              | $C_5Ga_2$      |              |              |              |
| 13             | -2.529488000 | -0.000011000 | -0.000825000 | 31             | -2.502484000 | -0.009685000 | -0.013081000 |
| 6              | 0.665615000  | -1.324264000 | -0.000444000 | 6              | 0.743497000  | -1.288048000 | 0.025402000  |
| 6              | -0.665644000 | 1.324589000  | 0.000885000  | 6              | -0.746752000 | 1.297285000  | 0.033954000  |
| 13             | 2.529613000  | 0.000015000  | 0.000106000  | 31             | 2.505659000  | 0.010549000  | -0.012167000 |
| 6              | 0.665573000  | 1.324285000  | -0.000488000 | 6              | 0.600695000  | 1.375909000  | 0.017603000  |
| 6              | -0.000293000 | -0.000005000 | 0.000427000  | 6              | -0.009548000 | -0.002718000 | 0.027919000  |
| 6              | -0.665604000 | -1.324618000 | 0.000841000  | 6              | -0.604294000 | -1.386896000 | 0.025571000  |
| $C_5In_2$      |              |              |              | $C_5Zn_2^{2+}$ |              |              |              |
| 49             | 2.822487000  | 0.000002000  | -0.000621000 | 30             | 0.000000000  | 0.000000000  | 2.350986000  |
| 6              | -0.665492000 | 1.324331000  | 0.001335000  | 6              | 0.000000000  | 1.278458000  | -0.660958000 |
| 6              | 0.665508000  | -1.324535000 | 0.001522000  | 6              | 0.000000000  | -1.278458000 | 0.660958000  |
| 49             | -2.822514000 | -0.000004000 | -0.000373000 | 30             | 0.000000000  | 0.000000000  | -2.350986000 |
| 6              | -0.665406000 | -1.324386000 | 0.001281000  | 6              | 0.000000000  | -1.278458000 | -0.660958000 |
| 6              | 0.000185000  | 0.000010000  | 0.002510000  | 6              | 0.000000000  | 0.000000000  | 0.000000000  |
| 6              | 0.665427000  | 1.324598000  | 0.001468000  | 6              | 0.000000000  | 1.278458000  | 0.660958000  |

**Table S2.** Cartesian coordinates of the  $[8\text{-CPP}]^2\text{-}[\text{Ca}_2\text{C}_5]^{2+}$  optimized structures at the  $\omega\text{b97XD/def2-TZVP}$  level.

| 1A |              |             |              | 1B |              |              |              |
|----|--------------|-------------|--------------|----|--------------|--------------|--------------|
| 6  | 1.419117000  | 4.409695000 | 0.608930000  | 6  | 1.407663000  | -4.220079000 | -0.277239000 |
| 6  | 0.689252000  | 3.819070000 | 1.638746000  | 6  | 0.690489000  | -3.594915000 | 0.741671000  |
| 6  | 0.706164000  | 5.123292000 | -0.355063000 | 6  | 0.692796000  | -4.938698000 | -1.234925000 |
| 6  | -0.689496000 | 3.826506000 | 1.633835000  | 6  | -0.690410000 | -3.594933000 | 0.741603000  |
| 6  | -0.679664000 | 5.127593000 | -0.362260000 | 6  | -0.692486000 | -4.938715000 | -1.234995000 |
| 6  | -1.405587000 | 4.422166000 | 0.597446000  | 6  | -1.407465000 | -4.220113000 | -0.277380000 |
| 1  | 1.238535000  | 5.642555000 | -1.142882000 | 1  | 1.224329000  | -5.471639000 | -2.014472000 |

|   |              |              |              |   |              |              |              |
|---|--------------|--------------|--------------|---|--------------|--------------|--------------|
| 1 | -1.212563000 | 3.253160000  | 2.387909000  | 1 | -1.208340000 | -2.996584000 | 1.481234000  |
| 1 | -1.201101000 | 5.649333000  | -1.155889000 | 1 | -1.223929000 | -5.471672000 | -2.014593000 |
| 6 | 2.845439000  | 4.034230000  | 0.469092000  | 6 | 2.843959000  | -3.885809000 | -0.414022000 |
| 6 | 3.365560000  | 3.716181000  | -0.782976000 | 6 | 3.663329000  | -3.709855000 | 0.698226000  |
| 6 | 3.625377000  | 3.713675000  | 1.582903000  | 6 | 3.347186000  | -3.477205000 | -1.650379000 |
| 6 | 4.506170000  | 2.937083000  | -0.902122000 | 6 | 4.836517000  | -2.976395000 | 0.606201000  |
| 6 | 4.750845000  | 2.921704000  | 1.468219000  | 6 | 4.517216000  | -2.747121000 | -1.746389000 |
| 6 | 5.151529000  | 2.419827000  | 0.227724000  | 6 | 5.229962000  | -2.381028000 | -0.601643000 |
| 1 | 2.811422000  | 3.970875000  | -1.677805000 | 1 | 3.342666000  | -4.075402000 | 1.665853000  |
| 1 | 3.301149000  | 4.024011000  | 2.568707000  | 1 | 2.752948000  | -3.635103000 | -2.542324000 |
| 1 | 4.838031000  | 2.638327000  | -1.893128000 | 1 | 5.417277000  | -2.795268000 | 1.506699000  |
| 1 | 5.279886000  | 2.608578000  | 2.359689000  | 1 | 4.826214000  | -2.357988000 | -2.708539000 |
| 6 | 5.918320000  | 1.164189000  | 0.122820000  | 6 | 6.052289000  | -1.154193000 | -0.576056000 |
| 6 | 6.631393000  | 0.647145000  | -0.988034000 | 6 | 6.921463000  | -0.703440000 | 0.449461000  |
| 6 | 5.543544000  | 0.061326000  | 0.917454000  | 6 | 5.566109000  | 0.000190000  | -1.228342000 |
| 6 | 6.654242000  | -0.754051000 | -0.887020000 | 6 | 6.921394000  | 0.703588000  | 0.449615000  |
| 6 | 5.945067000  | -1.136476000 | 0.281817000  | 6 | 6.052279000  | 1.154488000  | -0.575889000 |
| 1 | 7.105067000  | 1.231905000  | -1.763966000 | 1 | 7.500387000  | -1.331865000 | 1.111442000  |
| 1 | 4.857795000  | 0.120581000  | 1.751748000  | 1 | 4.772165000  | 0.000239000  | -1.963634000 |
| 1 | 7.139891000  | -1.423737000 | -1.582701000 | 1 | 7.500271000  | 1.331923000  | 1.111723000  |
| 6 | -2.832684000 | 4.053713000  | 0.444923000  | 6 | -2.843759000 | -3.885888000 | -0.414297000 |
| 6 | -3.631682000 | 3.758597000  | 1.552668000  | 6 | -3.346887000 | -3.477314000 | -1.650704000 |
| 6 | -3.338710000 | 3.722152000  | -0.809605000 | 6 | -3.663223000 | -3.709934000 | 0.697879000  |
| 6 | -4.765513000 | 2.977934000  | 1.434250000  | 6 | -4.516937000 | -2.747276000 | -1.746827000 |
| 6 | -4.487761000 | 2.955577000  | -0.932868000 | 6 | -4.836423000 | -2.976507000 | 0.605744000  |
| 6 | -5.158847000 | 2.468177000  | 0.195006000  | 6 | -5.229797000 | -2.381198000 | -0.602148000 |
| 1 | -3.316520000 | 4.080406000  | 2.537676000  | 1 | -2.752563000 | -3.635201000 | -2.542594000 |
| 1 | -2.768262000 | 3.956334000  | -1.699553000 | 1 | -3.342622000 | -4.075441000 | 1.665542000  |
| 1 | -5.311136000 | 2.685368000  | 2.322829000  | 1 | -4.825864000 | -2.358163000 | -2.709007000 |
| 1 | -4.812632000 | 2.651497000  | -1.924887000 | 1 | -5.417253000 | -2.795362000 | 1.506194000  |
| 6 | 5.144904000  | -2.363598000 | 0.468202000  | 6 | 5.229897000  | 2.381284000  | -0.601298000 |
| 6 | 4.465163000  | -2.612472000 | 1.664933000  | 6 | 4.517135000  | 2.747497000  | -1.745997000 |
| 6 | 4.737139000  | -3.106787000 | -0.650218000 | 6 | 4.836392000  | 2.976436000  | 0.606631000  |
| 6 | 3.306912000  | -3.366595000 | 1.682812000  | 6 | 3.347063000  | 3.477500000  | -1.649893000 |
| 6 | 3.583328000  | -3.873967000 | -0.624314000 | 6 | 3.663160000  | 3.709818000  | 0.698749000  |
| 6 | 2.786924000  | -3.931362000 | 0.517171000  | 6 | 2.843800000  | 3.885899000  | -0.413483000 |
| 1 | 4.782887000  | -2.109044000 | 2.569199000  | 1 | 4.826164000  | 2.358518000  | -2.708199000 |
| 1 | 5.284876000  | -3.013507000 | -1.582649000 | 1 | 5.417150000  | 2.795203000  | 1.507111000  |
| 1 | 2.733467000  | -3.418543000 | 2.600184000  | 1 | 2.752825000  | 3.635494000  | -2.541822000 |
| 1 | 3.257987000  | -4.363799000 | -1.533750000 | 1 | 3.342460000  | 4.075198000  | 1.666428000  |
| 6 | -5.947704000 | 1.223831000  | 0.094888000  | 6 | -6.052166000 | -1.154396000 | -0.576655000 |
| 6 | -5.589729000 | 0.118246000  | 0.893983000  | 6 | -5.565979000 | -0.000026000 | -1.228957000 |
| 6 | -6.680721000 | 0.713786000  | -1.004472000 | 6 | -6.921386000 | -0.703622000 | 0.448816000  |
| 6 | -6.733828000 | -0.688479000 | -0.891211000 | 6 | -6.921548000 | 0.703406000  | 0.448758000  |
| 6 | -6.024851000 | -1.077012000 | 0.274229000  | 6 | -6.052273000 | 1.154285000  | -0.576617000 |
| 1 | -4.909977000 | 0.170816000  | 1.734267000  | 1 | -4.771964000 | 0.000020000  | -1.964173000 |
| 1 | -7.147916000 | 1.302500000  | -1.781237000 | 1 | -7.500306000 | -1.332039000 | 1.110808000  |
| 1 | -7.239014000 | -1.352772000 | -1.578092000 | 1 | -7.500560000 | 1.331750000  | 1.110740000  |
| 6 | -5.241861000 | -2.316498000 | 0.466240000  | 6 | -5.229940000 | 2.381123000  | -0.601960000 |
| 6 | -4.562969000 | -2.566178000 | 1.663573000  | 6 | -4.517043000 | 2.747344000  | -1.746574000 |
| 6 | -4.840707000 | -3.066456000 | -0.649837000 | 6 | -4.836637000 | 2.976347000  | 0.606002000  |
| 6 | -3.412309000 | -3.332648000 | 1.683619000  | 6 | -3.347012000 | 3.477395000  | -1.650328000 |
| 6 | -3.694796000 | -3.846620000 | -0.621063000 | 6 | -3.663440000 | 3.709769000  | 0.698263000  |
| 6 | -2.896590000 | -3.905256000 | 0.519111000  | 6 | -2.843928000 | 3.885838000  | -0.413858000 |
| 1 | -4.878043000 | -2.059957000 | 2.567408000  | 1 | -4.825927000 | 2.358330000  | -2.708808000 |
| 1 | -5.391321000 | -2.975360000 | -1.581303000 | 1 | -5.417525000 | 2.795140000  | 1.506404000  |
| 1 | -2.841121000 | -3.392046000 | 2.602015000  | 1 | -2.752659000 | 3.635388000  | -2.542180000 |
| 1 | -3.374139000 | -4.343758000 | -1.527930000 | 1 | -3.342894000 | 4.075197000  | 1.665975000  |
| 6 | 1.353455000  | -4.295514000 | 0.442280000  | 6 | 1.407488000  | 4.220091000  | -0.276675000 |
| 6 | 0.633466000  | -3.872762000 | -0.673520000 | 6 | 0.690313000  | 3.594746000  | 0.742122000  |
| 6 | 0.633956000  | -4.828027000 | 1.512586000  | 6 | 0.692621000  | 4.938844000  | -1.234260000 |
| 6 | -0.746097000 | -3.864878000 | -0.672946000 | 6 | -0.690587000 | 3.594735000  | 0.742032000  |

|    |              |              |              |    |              |              |              |
|----|--------------|--------------|--------------|----|--------------|--------------|--------------|
| 6  | -0.751648000 | -4.821968000 | 1.513665000  | 6  | -0.692661000 | 4.938830000  | -1.234353000 |
| 6  | -1.466943000 | -4.284243000 | 0.443549000  | 6  | -1.407641000 | 4.220065000  | -0.276860000 |
| 1  | 1.151636000  | -3.425099000 | -1.511439000 | 1  | 1.208154000  | 2.996270000  | 1.481714000  |
| 1  | 1.161976000  | -5.211885000 | 2.377356000  | 1  | 1.224155000  | 5.471924000  | -2.013711000 |
| 1  | -1.258401000 | -3.401169000 | -1.505829000 | 1  | -1.208513000 | 2.996251000  | 1.481557000  |
| 1  | -1.281492000 | -5.202058000 | 2.379216000  | 1  | -1.224103000 | 5.471899000  | -2.013874000 |
| 1  | 1.201114000  | 3.237045000  | 2.393310000  | 1  | 1.208327000  | -2.996549000 | 1.481353000  |
| 20 | 4.054296000  | -0.170594000 | -1.166685000 | 20 | -4.414885000 | 0.000092000  | 1.053459000  |
| 20 | -4.152866000 | -0.169211000 | -1.199598000 | 20 | 4.414782000  | 0.000011000  | 1.053971000  |
| 6  | 1.921760000  | -0.381899000 | -2.235168000 | 6  | -2.389543000 | -0.000088000 | 2.252068000  |
| 6  | 0.666452000  | -0.302823000 | -1.694841000 | 6  | 2.389333000  | -0.000211000 | 2.252409000  |
| 6  | -1.933833000 | -0.368632000 | -1.990961000 | 6  | -1.216347000 | -0.000259000 | 2.677323000  |
| 6  | -0.715283000 | -0.345137000 | -1.867640000 | 6  | 1.216116000  | -0.000309000 | 2.677607000  |
| 6  | 1.705887000  | -0.147766000 | -0.817668000 | 6  | -0.000185000 | -0.000416000 | 3.247580000  |
| IC |              |              |              |    |              |              |              |
| 6  | 0.919823000  | -5.104230000 | 1.404348000  |    |              |              |              |
| 6  | 1.942098000  | -4.482721000 | 0.690332000  |    |              |              |              |
| 6  | 0.054472000  | -5.937044000 | 0.691668000  |    |              |              |              |
| 6  | 1.942098000  | -4.482721000 | -0.690332000 |    |              |              |              |
| 6  | 0.054472000  | -5.937044000 | -0.691668000 |    |              |              |              |
| 6  | 0.919823000  | -5.104230000 | -1.404348000 |    |              |              |              |
| 1  | -0.696043000 | -6.512790000 | 1.220013000  |    |              |              |              |
| 1  | 2.644741000  | -3.841297000 | -1.206036000 |    |              |              |              |
| 1  | -0.696043000 | -6.512790000 | -1.220013000 |    |              |              |              |
| 6  | 0.580799000  | -4.543972000 | 2.732879000  |    |              |              |              |
| 6  | -0.752757000 | -4.222722000 | 2.979947000  |    |              |              |              |
| 6  | 1.538517000  | -3.985238000 | 3.581688000  |    |              |              |              |
| 6  | -1.092121000 | -3.230515000 | 3.881894000  |    |              |              |              |
| 6  | 1.202850000  | -2.990659000 | 4.481007000  |    |              |              |              |
| 6  | -0.107916000 | -2.510728000 | 4.567594000  |    |              |              |              |
| 1  | -1.531113000 | -4.652121000 | 2.362079000  |    |              |              |              |
| 1  | 2.578711000  | -4.268794000 | 3.475365000  |    |              |              |              |
| 1  | -2.132344000 | -2.936304000 | 3.969812000  |    |              |              |              |
| 1  | 1.981517000  | -2.516410000 | 5.065384000  |    |              |              |              |
| 6  | -0.417423000 | -1.164760000 | 5.074998000  |    |              |              |              |
| 6  | -1.707376000 | -0.628532000 | 5.307310000  |    |              |              |              |
| 6  | 0.462370000  | -0.070629000 | 4.917840000  |    |              |              |              |
| 6  | -1.617614000 | 0.769857000  | 5.270531000  |    |              |              |              |
| 6  | -0.272440000 | 1.133574000  | 5.007892000  |    |              |              |              |
| 1  | -2.607478000 | -1.194269000 | 5.499713000  |    |              |              |              |
| 1  | 1.505858000  | -0.160473000 | 4.652820000  |    |              |              |              |
| 1  | -2.444478000 | 1.449033000  | 5.416735000  |    |              |              |              |
| 6  | 0.580799000  | -4.543972000 | -2.732879000 |    |              |              |              |
| 6  | 1.538517000  | -3.985238000 | -3.581688000 |    |              |              |              |
| 6  | -0.752757000 | -4.222722000 | -2.979947000 |    |              |              |              |
| 6  | 1.202850000  | -2.990659000 | -4.481007000 |    |              |              |              |
| 6  | -1.092121000 | -3.230515000 | -3.881894000 |    |              |              |              |
| 6  | -0.107916000 | -2.510728000 | -4.567594000 |    |              |              |              |
| 1  | 2.578711000  | -4.268794000 | -3.475365000 |    |              |              |              |
| 1  | -1.531113000 | -4.652121000 | -2.362079000 |    |              |              |              |
| 1  | 1.981517000  | -2.516410000 | -5.065384000 |    |              |              |              |
| 1  | -2.132344000 | -2.936304000 | -3.969812000 |    |              |              |              |
| 6  | 0.171022000  | 2.443238000  | 4.498897000  |    |              |              |              |
| 6  | 1.389492000  | 2.565411000  | 3.826694000  |    |              |              |              |
| 6  | -0.695266000 | 3.541273000  | 4.433593000  |    |              |              |              |
| 6  | 1.620654000  | 3.609910000  | 2.952759000  |    |              |              |              |
| 6  | -0.458599000 | 4.590304000  | 3.564172000  |    |              |              |              |
| 6  | 0.654359000  | 4.588365000  | 2.721643000  |    |              |              |              |
| 1  | 2.124037000  | 1.773384000  | 3.889052000  |    |              |              |              |
| 1  | -1.612534000 | 3.535454000  | 5.008823000  |    |              |              |              |
| 1  | 2.510985000  | 3.580942000  | 2.338013000  |    |              |              |              |
| 1  | -1.198415000 | 5.377024000  | 3.477012000  |    |              |              |              |

|    |              |              |              |
|----|--------------|--------------|--------------|
| 6  | -0.417423000 | -1.164760000 | -5.074998000 |
| 6  | 0.462370000  | -0.070629000 | -4.917840000 |
| 6  | -1.707376000 | -0.628532000 | -5.307310000 |
| 6  | -1.617614000 | 0.769857000  | -5.270531000 |
| 6  | -0.272440000 | 1.133574000  | -5.007892000 |
| 1  | 1.505858000  | -0.160473000 | -4.652820000 |
| 1  | -2.607478000 | -1.194269000 | -5.499713000 |
| 1  | -2.444478000 | 1.449033000  | -5.416735000 |
| 6  | 0.171022000  | 2.443238000  | -4.498897000 |
| 6  | 1.389492000  | 2.565411000  | -3.826694000 |
| 6  | -0.695266000 | 3.541273000  | -4.433593000 |
| 6  | 1.620654000  | 3.609910000  | -2.952759000 |
| 6  | -0.458599000 | 4.590304000  | -3.564172000 |
| 6  | 0.654359000  | 4.588365000  | -2.721643000 |
| 1  | 2.124037000  | 1.773384000  | -3.889052000 |
| 1  | -1.612534000 | 3.535454000  | -5.008823000 |
| 1  | 2.510985000  | 3.580942000  | -2.338013000 |
| 1  | -1.198415000 | 5.377024000  | -3.477012000 |
| 6  | 0.664940000  | 5.267718000  | 1.405180000  |
| 6  | -0.531197000 | 5.307523000  | 0.690565000  |
| 6  | 1.840969000  | 5.509972000  | 0.691575000  |
| 6  | -0.531197000 | 5.307523000  | -0.690565000 |
| 6  | 1.840969000  | 5.509972000  | -0.691575000 |
| 6  | 0.664940000  | 5.267718000  | -1.405180000 |
| 1  | -1.470849000 | 5.157279000  | 1.206434000  |
| 1  | 2.784176000  | 5.588730000  | 1.218653000  |
| 1  | -1.470849000 | 5.157279000  | -1.206434000 |
| 1  | 2.784176000  | 5.588730000  | -1.218653000 |
| 20 | -0.988834000 | -0.076901000 | 2.776290000  |
| 6  | -2.328108000 | 0.051840000  | -0.662477000 |
| 6  | 0.328735000  | -0.261353000 | 0.661720000  |
| 20 | -0.988834000 | -0.076901000 | -2.776290000 |
| 6  | 0.328735000  | -0.261353000 | -0.661720000 |
| 6  | -1.000594000 | -0.105548000 | 0.000000000  |
| 6  | -2.328108000 | 0.051840000  | 0.662477000  |
| 1  | 2.644741000  | -3.841297000 | 1.206036000  |
